# Supplementary material for: Recognition of BRAF by CDC37 and Re-Evaluation of the Activation Mechanism for the Class 2 BRAF-L597R Mutant
Source: MDPI journal article supplement (doi:10.3390/biom12070905), 2022-06-28
Supplement: s1 [file s1]

Supplementary Figure S1

| Cdc37 construct                            | Cdc37 Structure                                                                     | Binding partner       | Binding parameters         | Refer to Fig |
|--------------------------------------------|-------------------------------------------------------------------------------------|-----------------------|----------------------------|--------------|
| Full-length                                | 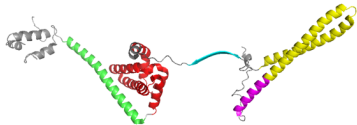   | sBraf                 | $K_d = 1.0 \mu\text{M}$    | 1A           |
| Full-length                                |    | sBrafV600E            | $K_d = 0.41 \mu\text{M}$ . | 1B           |
| Full-length                                |    | sBrafV600E+<br>AMPPNP | NB                         | 1C           |
| Full-length                                |    | sBrafV600E+<br>ADP    | NB                         | 1D           |
| N<br>1-120                                 |   | sBrafV600E            | $K_d = 278 \mu\text{M}$    | 2B           |
| C-terminal<br>Domain<br>273-348            |  | sBrafV600E            | $K_d = 104 \mu\text{M}$ .  | 2C           |
| Middle domain<br>148-269                   |  | sBrafV600E            | NB                         | 2D           |
| Cdc37<br>TrpZip                            |  | sBrafV600E            | $K_d = 0.5 \mu\text{M}$ .  | 3A           |
| Cdc37<br>$\Delta(\text{CC-}\beta\text{S})$ |  | sBrafV600E            | $K_d = 0.61 \mu\text{M}$   | 3B           |

Supplementary Figure S1 continued

| Cdc37 construct                                   | Cdc37 Structure                                                                     | Binding partner | Binding parameters         | Refer to Fig |
|---------------------------------------------------|-------------------------------------------------------------------------------------|-----------------|----------------------------|--------------|
| Full-length                                       | 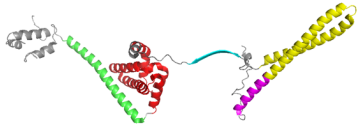   | sBrafV600E      | $K_d = 0.41 \mu\text{M}$ . | 1B           |
| Cdc37 $\Delta(7\text{-CC-}\beta\text{S-272-285})$ |    | sBrafV600E      | $K_d = 1.03 \mu\text{M}$ . | 3C           |
| Cdc37 N <sup>m</sup> C                            |    | sBrafV600E      | $K_d = 145 \mu\text{M}$ .  | 3D           |
| Cdc37 N <sup>m</sup> (+14)-C                      |    | sBrafV600E      | $K_d = 8.7 \mu\text{M}$    | 4A           |
| Cdc37 N <sup>m</sup> (+6)-C                       |  | sBrafV600E      | $K_d = 18 \mu\text{M}$     | 4B           |
| Cdc37 N <sup>m</sup> (+41)-C                      |  | sBrafV600E      | $K_d = 1.99 \mu\text{M}$   | 4C           |
| Cdc37 1-343                                       |  | sBrafV600E      | $K_d = 0.76 \mu\text{M}$   | 5A           |
| Cdc37 V343A                                       |  | sBrafV600E      | $K_d = 0.9 \mu\text{M}$ .  | 5B           |
| Cdc37 V343R                                       |  | sBrafV600E      | $K_d = 1.3 \mu\text{M}$ .  | 5C           |

Supplementary Figure S1 continued

| Cdc37 construct  | Cdc37 Structure                                                                     | Binding partner | Binding parameters       | Refer to Fig |
|------------------|-------------------------------------------------------------------------------------|-----------------|--------------------------|--------------|
| Full-length      |    | sBrafV600E      | $K_d = 0.41 \mu\text{M}$ | 1B           |
| Cdc37 1-342      |    | sBrafV600E      | $K_d = 45.7 \mu\text{M}$ | 5D           |
| Cdc37 W342A      |    | sBrafV600E      | $K_d = 94.3 \mu\text{M}$ | 5E           |
| Cdc37 W342R      |  | sBrafV600E      | NB                       | 5F           |
| Full-length S13E |  | sBrafV600E      | $K_d = 0.30 \mu\text{M}$ | 6A           |
| Cdc37 N22A       |  | sBrafV600E      | $K_d = 27.3 \mu\text{M}$ | 7A           |
| Cdc37 N22R       |  | sBrafV600E      | $K_d = 14.2 \mu\text{M}$ | 7B           |

Supplementary Figure S1 continued

| Cdc37 construct   | Cdc37 Structure                                                                     | Binding partner | Binding parameters         | Refer to Fig |
|-------------------|-------------------------------------------------------------------------------------|-----------------|----------------------------|--------------|
| Full-length       | 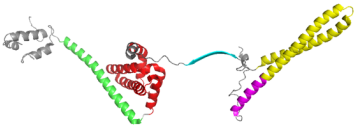   | sBrafV600E      | $K_d = 0.41 \mu\text{M}$   | 1B           |
| Full-length L28R  |    | sBrafV600E      | NB                         | 8B           |
| Full-length L28A  |    | sBrafV600E      | $K_d = 16.9 \mu\text{M}$ . | 8C           |
| Full-length W31K  |   | sBrafV600E      | NB                         | 8D           |
| Full-length W31A  |  | sBrafV600E      | $K_d = 2.1 \mu\text{M}$    | 8E           |
| Full-length S27K  |  | sBrafV600E      | NB                         | 8F           |
| Full-length S27A  |  | sBrafV600E      | $K_d = 1.6 \mu\text{M}$ .  | 8G           |
| Full-length Q47R  |  | sBrafV600E      | $K_d = 0.3 \mu\text{M}$    | 8H           |
| Full-length Q347A |  | sBrafV600E      | $K_d = 0.35 \mu\text{M}$ . | 8I           |

Supplementary Figure S1 continued

| Cdc37 construct | Cdc37 Structure                                                                     | Binding partner                 | Binding parameters       | Refer to Fig |
|-----------------|-------------------------------------------------------------------------------------|---------------------------------|--------------------------|--------------|
| Full-length     | 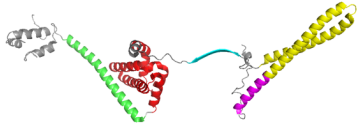   | sBrafV600E                      | $K_d = 0.41 \mu\text{M}$ | 1B           |
| Full-length     |    | sBrafV600E<br>T599E-V600E-S602D | $K_d = 0.47 \mu\text{M}$ | 9A           |
| Full-length     |    | sBrafV600E<br>T599W-V600E       | $K_d = 0.23 \mu\text{M}$ | 9B           |
| Full-length     |   | sBraf F595A                     | $K_d = 0.5 \mu\text{M}$  | 10A          |
| Full-length     |  | sBraf F595R                     | $K_d = 1.4 \mu\text{M}$  | 10B          |
| Full-length     |  | sBraf D594V                     | $K_d = 1.2 \mu\text{M}$  | 10C          |
| Full-length     |  | sBraf L597A                     | $K_d = 0.23 \mu\text{M}$ | 10D          |
| Full-length     |  | sBraf L597R                     | NB                       | 10E          |
| Full-length     |  | sBraf L597R-V600E               | $K_d = 0.34 \mu\text{M}$ | 11D          |

**Supplementary Figure S1 Constructs used in this study.**

**Refer to Figure 2A for amino acid positions of the various structural elements of Cdc37. *K<sub>d</sub>* values and the figure that each experiment represents is indicated.**
